# Supplementary material for: Prospective Longitudinal Evaluation of the Effect of Deployment-Acquired Traumatic Brain Injury on Posttraumatic Stress and Related Disorders: Results From the Army Study to Assess Risk and Resilience in Servicemembers (Army STARRS)
Source: Atypon-hosted journal article supplement (doi:10.1176/appi.ajp.2015.14121572), 2015-09-04
Supplement: appi.ajp.2015.14121572.ds001.pdf [file appi.ajp.2015.14121572.ds001.pdf]

**I. TBI Medical Records Check - UCSD PPDS Dataset T1 TBI Indicator by New TBI Diagnosis  
between T0 and T1 Date**

**The *FREQ* Procedure**

| Frequency<br>Percent<br>Row Pct<br>Col Pct | Table of tbi_dx by TBI_t1 |                |                 |        |       |
|--------------------------------------------|---------------------------|----------------|-----------------|--------|-------|
|                                            | tbi_dx                    | TBI_t1(TBI_t1) |                 |        | Total |
|                                            |                           | Mild           | Moderate/Severe | None   |       |
| 0                                          | 839                       | 53             | 3746            | 4638   |       |
|                                            | 18.06                     | 1.14           | 80.65           | 99.85  |       |
|                                            | 18.09                     | 1.14           | 80.77           |        |       |
|                                            | 99.64                     | 94.64          | 99.97           |        |       |
| 1                                          | 3                         | 3              | 1               | 7      |       |
|                                            | 0.06                      | 0.06           | 0.02            | 0.15   |       |
|                                            | 42.86                     | 42.86          | 14.29           |        |       |
|                                            | 0.36                      | 5.36           | 0.03            |        |       |
| Total                                      | 842                       | 56             | 3747            | 4645   |       |
|                                            | 18.13                     | 1.21           | 80.67           | 100.00 |       |

**Statistics for Table of tbi\_dx by TBI\_t1**

| Statistic                                                                                       | DF | Value    | Prob   |
|-------------------------------------------------------------------------------------------------|----|----------|--------|
| Chi-Square                                                                                      | 2  | 107.0767 | <.0001 |
| Likelihood Ratio Chi-Square                                                                     | 2  | 23.2901  | <.0001 |
| Mantel-Haenszel Chi-Square                                                                      | 1  | 9.7492   | 0.0018 |
| Phi Coefficient                                                                                 |    | 0.1518   |        |
| Contingency Coefficient                                                                         |    | 0.1501   |        |
| Cramer's V                                                                                      |    | 0.1518   |        |
| WARNING: 33% of the cells have expected counts less than 5. Chi-Square may not be a valid test. |    |          |        |

| Fisher's Exact Test   |           |
|-----------------------|-----------|
| Table Probability (P) | 1.117E-06 |
| Pr <= P               | 2.408E-06 |

**Sample Size = 4645**

***Iia. Exposure to a Concussive Event - UCSD PPDS Dataset T1 TBI Indicator by Event Indicators  
Across all forms (PDHA/PDHRA shorter time window) for Deployment (Question 9a)***

***The FREQ Procedure***

| Frequency<br>Percent<br>Row Pct<br>Col Pct | Table of Any_Concussive_Event by TBI_t1 |                             |                                 |                |       |
|--------------------------------------------|-----------------------------------------|-----------------------------|---------------------------------|----------------|-------|
|                                            | Any_Concussive_Event                    | TBI_t1(TBI_t1)              |                                 |                | Total |
|                                            |                                         | Mild                        | Moderate/Severe                 | None           |       |
| 0                                          | 382<br>9.76<br>12.72<br>54.49           | 20<br>0.51<br>0.67<br>46.51 | 2600<br>66.41<br>86.61<br>81.99 | 3002<br>76.68  |       |
| 1                                          | 319<br>8.15<br>34.94<br>45.51           | 23<br>0.59<br>2.52<br>53.49 | 571<br>14.58<br>62.54<br>18.01  | 913<br>23.32   |       |
| <b>Total</b>                               | 701<br>17.91                            | 43<br>1.10                  | 3171<br>81.00                   | 3915<br>100.00 |       |

***Statistics for Table of Any\_Concussive\_Event by TBI\_t1***

| Statistic                   | DF | Value    | Prob   |
|-----------------------------|----|----------|--------|
| Chi-Square                  | 2  | 264.9060 | <.0001 |
| Likelihood Ratio Chi-Square | 2  | 236.8674 | <.0001 |
| Mantel-Haenszel Chi-Square  | 1  | 253.6936 | <.0001 |
| Phi Coefficient             |    | 0.2601   |        |
| Contingency Coefficient     |    | 0.2517   |        |
| Cramer's V                  |    | 0.2601   |        |

| Fisher's Exact Test   |           |
|-----------------------|-----------|
| Table Probability (P) | 1.647E-54 |
| Pr <= P               | 9.487E-53 |

***Sample Size = 3915***

**Iib. TBI Referral - UCSD PPDS Dataset T1 TBI Indicator by Any TBI Referral Across all forms  
(PDHA/PDHRA - shorter time window) for deployment**

**The FREQ Procedure**

| Frequency<br>Percent<br>Row Pct<br>Col Pct | Table of TBI_Referral_z1 by TBI_t1 |                             |                                 |                |       |
|--------------------------------------------|------------------------------------|-----------------------------|---------------------------------|----------------|-------|
|                                            | TBI_Referral_z1                    | TBI_t1(TBI_t1)              |                                 |                | Total |
|                                            |                                    | Mild                        | Moderate/Severe                 | None           |       |
| <b>0.None</b>                              | 524<br>13.38<br>14.42<br>74.75     | 24<br>0.61<br>0.66<br>55.81 | 3086<br>78.83<br>84.92<br>97.32 | 3634<br>92.82  |       |
| <b>1.TBI Referral</b>                      | 125<br>3.19<br>71.02<br>17.83      | 15<br>0.38<br>8.52<br>34.88 | 36<br>0.92<br>20.45<br>1.14     | 176<br>4.50    |       |
| <b>2.Potential TBI + No Referral</b>       | 52<br>1.33<br>49.52<br>7.42        | 4<br>0.10<br>3.81<br>9.30   | 49<br>1.25<br>46.67<br>1.55     | 105<br>2.68    |       |
| <b>Total</b>                               | 701<br>17.91                       | 43<br>1.10                  | 3171<br>81.00                   | 3915<br>100.00 |       |

**Statistics for Table of TBI\_Referral\_z1 by TBI\_t1**

| Statistic                                                                                       | DF | Value    | Prob   |
|-------------------------------------------------------------------------------------------------|----|----------|--------|
| Chi-Square                                                                                      | 4  | 564.1506 | <.0001 |
| Likelihood Ratio Chi-Square                                                                     | 4  | 409.2279 | <.0001 |
| Mantel-Haenszel Chi-Square                                                                      | 1  | 347.4772 | <.0001 |
| Phi Coefficient                                                                                 |    | 0.3796   |        |
| Contingency Coefficient                                                                         |    | 0.3549   |        |
| Cramer's V                                                                                      |    | 0.2684   |        |
| WARNING: 22% of the cells have expected counts less than 5. Chi-Square may not be a valid test. |    |          |        |

| Fisher's Exact Test   |           |
|-----------------------|-----------|
| Table Probability (P) | 2.635E-93 |
| Pr <= P               | 1.210E-88 |

**Sample Size = 3915**

*Iic. TBI Symptoms - UCSD PPDS Dataset T1 TBI Indicator by Any TBI Symptoms Across all forms (PDHA/PDHRA - shorter time window) for deployment*

*The FREQ Procedure*

| Frequency<br>Percent<br>Row Pct<br>Col Pct | Table of Any_TBI_Symptoms by TBI_t1 |                             |                                 |                |       |
|--------------------------------------------|-------------------------------------|-----------------------------|---------------------------------|----------------|-------|
|                                            | Any_TBI_Symptoms                    | TBI_t1(TBI_t1)              |                                 |                |       |
|                                            |                                     | Mild                        | Moderate/Severe                 | None           | Total |
| 0                                          | 482<br>12.31<br>13.53<br>68.76      | 21<br>0.54<br>0.59<br>48.84 | 3059<br>78.14<br>85.88<br>96.47 | 3562<br>90.98  |       |
| 1                                          | 219<br>5.59<br>62.04<br>31.24       | 22<br>0.56<br>6.23<br>51.16 | 112<br>2.86<br>31.73<br>3.53    | 353<br>9.02    |       |
| Total                                      | 701<br>17.91                        | 43<br>1.10                  | 3171<br>81.00                   | 3915<br>100.00 |       |

*Statistics for Table of Any\_TBI\_Symptoms by TBI\_t1*

| Statistic                   | DF | Value    | Prob   |
|-----------------------------|----|----------|--------|
| Chi-Square                  | 2  | 631.4418 | <.0001 |
| Likelihood Ratio Chi-Square | 2  | 472.7290 | <.0001 |
| Mantel-Haenszel Chi-Square  | 1  | 572.5967 | <.0001 |
| Phi Coefficient             |    | 0.4016   |        |
| Contingency Coefficient     |    | 0.3727   |        |
| Cramer's V                  |    | 0.4016   |        |

| Fisher's Exact Test   |            |
|-----------------------|------------|
| Table Probability (P) | 1.511E-105 |
| Pr <= P               | 2.515E-104 |

*Sample Size = 3915*
